# Supplementary material for: The Influence of Obesity on Puberty and Insulin Resistance in Mexican Children
Source: Int J Endocrinol. 2018 Sep 3;2018:7067292. doi: 10.1155/2018/7067292 (PMC6140127; doi:10.1155/2018/7067292)
Supplement: Supplementary Materials — Figure S1: location of the schools participating in the study. The study population (n = 378) was recruited from three elementary (n = 171) and five middle (n = 207) schools from the cities of Zacatecas and Guadalupe, Mexico; 189 girls (♀) and 189 boys (♂). Scale 1 : 2000 ft. Table S1: characteristics of study participants classified by sex. Figure S2: comparison between clinical findings between study groups classified by gender and specific Tanner stages. [file 7067292.f1.docx]

**- Supplementary Information -**

**The influence of obesity on puberty and insulin resistance in Mexican children**

Edith Cardenas-Vargas,1,2 Jairo A. Nava,2 Idalia Garza-Veloz,2,3 Mayra C. Torres-Castañeda,4 Carlos E. Galván-Tejada,3 Miguel A. Cid-Baez,2 Rosa E. Castañeda-Arteaga,1,2 Yolanda Ortiz-castro,2 Perla M. Trejo-Ortiz,5 Roxana Araujo-Espino,5 Fabiana E. Mollinedo-Montaño,5 Jose Ramon Muñoz-Torres,2 and Margarita L. Martinez-Fierro2,3

1Hospital General Zacatecas "Luz González Cosío", Servicios de Salud de Zacatecas, Zacatecas 98160, Mexico.

2Molecular Medicine Laboratory, Unidad Academica de Medicina Humana y C.S, Universidad Autonoma de Zacatecas, Zacatecas 98160, Mexico.

3Unidad Academica de Ingenieria Electrica, Universidad Autonoma de Zacatecas, Zacatecas 98160, Mexico.

4Servicio de Endocrinologia Pedriatrica. Hospital General “Gaudencio González Garza”. Centro Medico Nacional La Raza. Instituto Mexicano del Seguro Social (IMSS). Ciudad de Mexico 02990, Mexico.

5Unidad Academica de Enfermeria, Universidad Autonoma de Zacatecas, Zacatecas 98160, Mexico.

To whom the correspondence should be addressed:

Margarita L Martinez-Fierro, D.Sc.

Unidad Academica de Medicina Humana y Ciencias de la Salud.

Universidad Autonoma de Zacatecas.

Carretera Zacatecas-Guadalajara Km.6. Ejido la Escondida, Zacatecas, Mexico.

e-mail: [margaritamf@uaz.edu.mx](mailto:margaritamf@uaz.edu.mx).

*And*

Edith Cardenas-Vargas. MD.

Departamento de Enseñanza e Investigacion. Hospital General Zacatecas "Luz González Cosío", Servicios de Salud de Zacatecas, Zacatecas, Mexico. Circuito Ciudad Gobierno No. 410. Col. Ciudad Gobierno. C.P. 98160. Tel.: +52 (492) 4914130

E-mail address: [edithcardenasv@gmail.com](mailto:edithcardenasv@gmail.com)

**
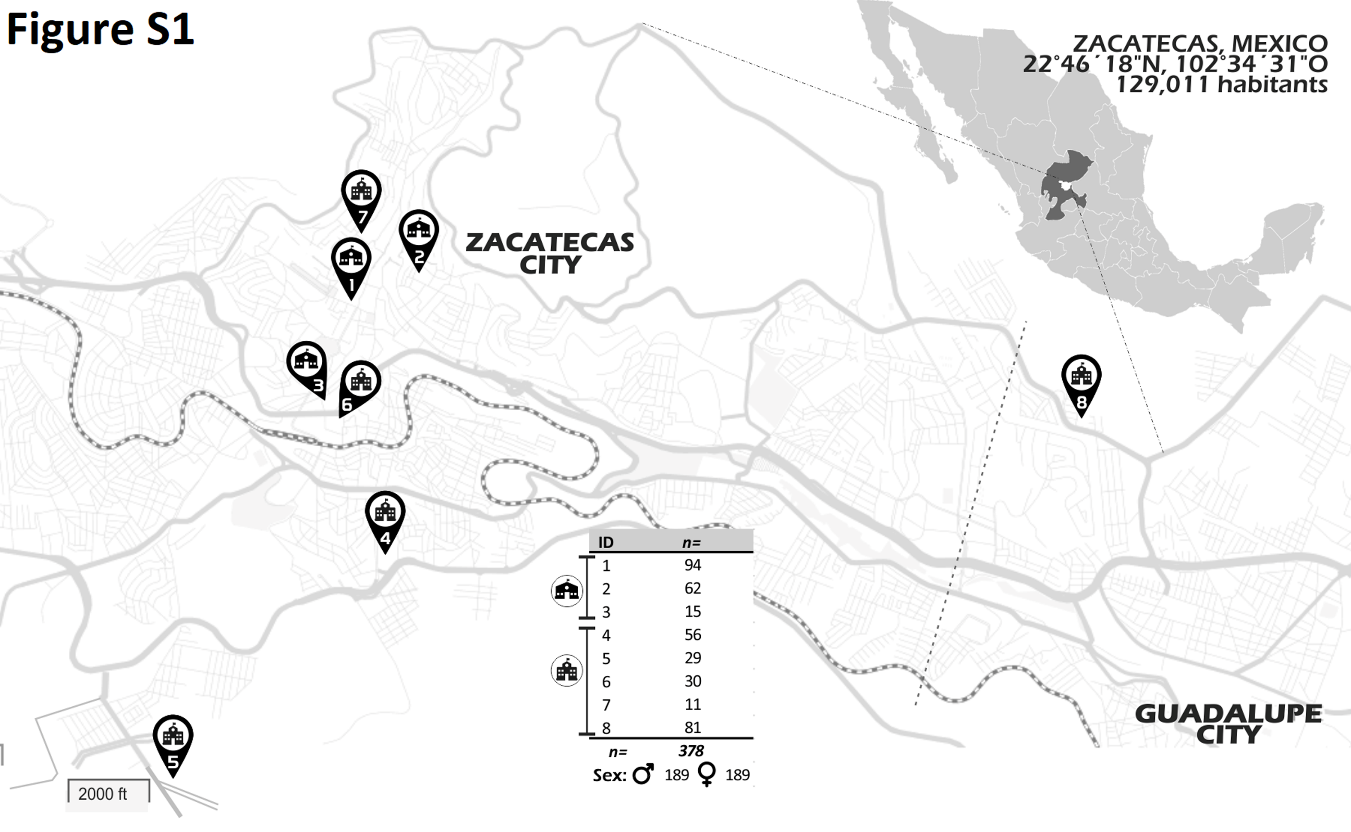
**

Figure S1: Location of the schools participating in the study. The study population (n = 378) was recruited from three elementary (n = 171) and five middle schools (n = 207) from the cities of Zacatecas and Guadalupe, Mexico; 189 girls (♀) and 189 boys (♂). Scale 1:2000 ft.

| **Table S1.** Characteristics of study participants classified by sex | | | |  |
| --- | --- | --- | --- | --- |
| **Characteristic** | **General**  **(n= 378)** | **Girls**  **(n=189)** | **Boys**  **(n=189)** | ***P-*value†** |
| Age (years) | 11.5 ± 1.9 | 10.8 ± 1.8 | 12.2 ± 1.9 | **< 0.001** |
| Birthweight (g) | 3099.6 ± 623.7 | 3015.8 ± 616.9 | 3194.1 ± 619.9 | 0.009 |
| Weight (kg) | 52.6 ± 17.7 | 48.5 ± 16.0 | 56.7 ± 18.4 | **< 0.001** |
| Height (m) | 1.5 ± 0.1 | 1.5 ± 0.1 | 1.6 ± 0.1 | **< 0.001** |
| Waist circumference (cm) | 79.0 ± 14.4 | 75.4 ± 12.9 | 82.6 ± 14.9 | **< 0.001** |
| Body mass index (kg/m2) | 22.1 ± 4.9 | 21.6 ± 4.8 | 22.5 ± 5.0 | 0.081 |
| Diastolic blood pressure (mmHg) | 76.3 ± 11.6 | 73.8 ± 11.7 | 78.8 ± 10.9 | **< 0.001** |
| Systolic blood pressure (mmHg) | 108.5 ± 11.4 | 105.6 ± 10.8 | 111.3 ± 11.2 | **< 0.001** |
| Family history of DM2, n (%) | 282 (74.6) | 145 (76.7) | 137 (72.5) | 0.408 |
| Acanthosis nigricans, n (%) | 195 (51.6) | 81 (42.9) | 114 (60.3) | **< 0.001** |
| Tanner stage |  |  |  |  |
| 1 | 72 (19.0) | 37 (51.0) | 35 (49.0) | 0.668 |
| 2 | 73 (19.3) | 31 (42.0) | 42 (58.0) |
| 3 | 81 (21.4) | 44 (54.0) | 37 (46.0) |
| 4 | 80 (21.2) | 41 (51.0) | 39 (49.0) |
| 5 | 72 (19.0) | 36 (50.0) | 36 (50.0) |
| Fasting glucose (mg/dl) | 79.6 ± 8.4 | 77.3 ± 7.3 | 82.0 ± 8.8 | **< 0.001** |
| Fasting insulin (μIU/mL) | 11.7 ± 9.2 | 12.3 ± 10.5 | 11.0 ± 7.7 | 0.59 |
| HOMA-IR | 2.3 ± 1.9 | 2.4 ± 2.1 | 2.3 ± 1.7 | 0.82 |
| *HOMA-IR > 3.16, n (%) | 87 (23.0) | 45 (23.8) | 42 (22.2) | 0.807 |
| †*P* value from the comparison between girls and boys. Data are expressed as mean ± SD or frequency (%). *HOMA-IR cutoff value for the pediatric population. | | | | |


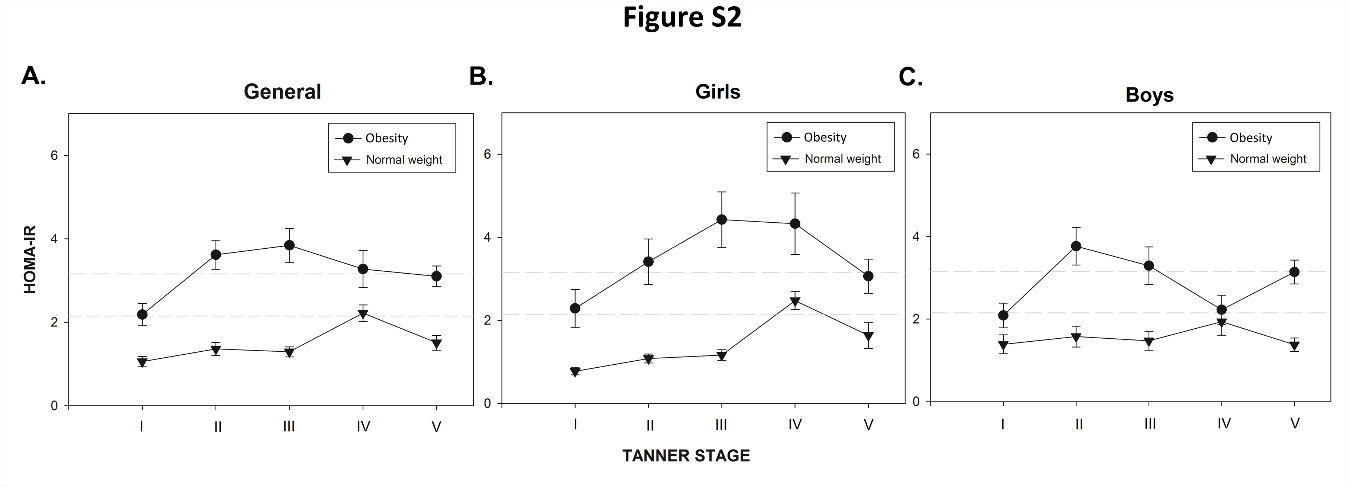


**Figure S2:** Comparison between clinical findings between study groups classified by gender and specific Tanner stages.
